# Supplementary material for: Utilization of Waste Straw Biomass in Suspension Magnetization Roasting of Refractory Iron Ore: Iron Recovery, Gas Analysis and Roasted Product Characterization
Source: MDPI journal article supplement (doi:10.3390/su152215730), 2023-11-08
Supplement: s1 [file s1]

# **Utilization of waste straw biomass in suspension magnetization roasting of refractory iron ore: iron recovery, gas analysis and roasted products characterization**

**Yue Cao<sup>1,2</sup>, Yongsheng Sun<sup>1,2,\*</sup>, Peng Gao<sup>1,2</sup>, Wenbo Li<sup>1,2</sup>**

*1. School of Resources and Civil Engineering, Northeastern University, Shenyang 110819, China*

*2. National-local Joint Engineering Research Center of High-efficient Exploitation Technology for Refractory Iron Ore Resources, Shenyang 110819, China.*

## **Captions**

Figure S1. Preparation process of straw powder.

Figure S2. The general ion diagrams of straw-type and hematite ores mixture at different characteristic temperature: (a) 329 °C, and (b) 820 °C.

Table S1. Peak areas of evolved compounds at 329 °C in SMR process by GC/MS.

Table S2. Peak areas of evolved compounds at 820 °C in SMR process by GC/MS.

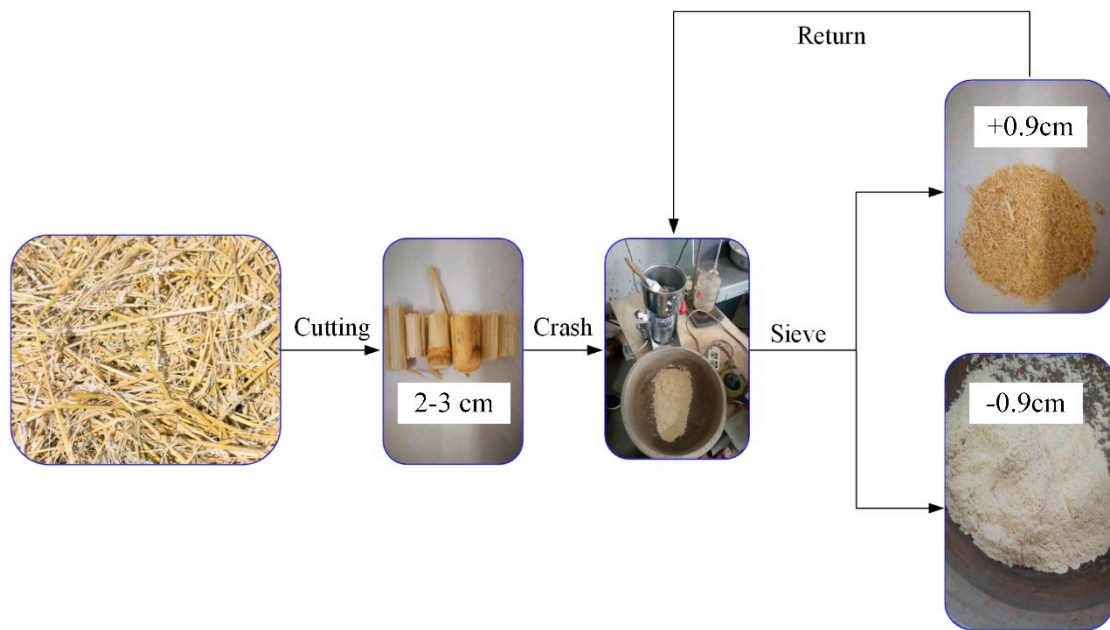

Figure S1. Preparation process of straw powder.

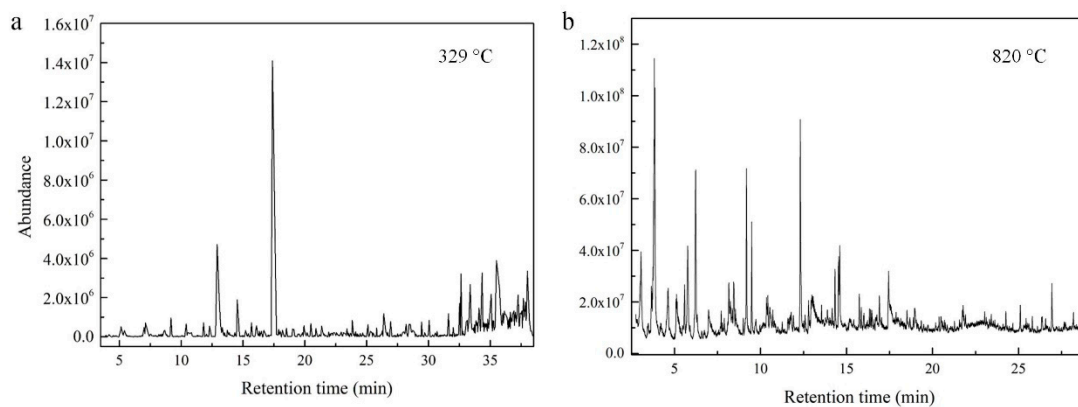

Figure S2. The general ion diagrams of straw-type and hematite ores mixture at different characteristic temperature: (a) 329 °C, and (b) 820 °C.

Table S1. Peak areas of evolved compounds at 329 °C in SMR process by GC/MS.

| Retention time<br>(min) | Molecular<br>formula                                          | Compounds                                                  | Relative<br>content (%) |
|-------------------------|---------------------------------------------------------------|------------------------------------------------------------|-------------------------|
| 12.899                  | C <sub>8</sub> H <sub>8</sub> O                               | 4-methylbenzaldehyde                                       | 2.73                    |
| 13.059                  | C <sub>8</sub> H <sub>8</sub> O                               | Vinyl phenyl ether                                         | 1.22                    |
| 14.534                  | C <sub>9</sub> H <sub>10</sub> O <sub>2</sub>                 | 2-methyl-4-hydroxyacetophenone                             | 1.10                    |
| 17.375                  | C <sub>6</sub> H <sub>10</sub> O <sub>5</sub>                 | 1,6-anhydro-β-D-glucose                                    | 8.16                    |
| 26.389                  | C <sub>15</sub> H <sub>24</sub> O <sub>2</sub>                | 3,5-di-tert-butyle-4-hydroxyanisole                        | 0.68                    |
| 31.621                  | C <sub>17</sub> H <sub>30</sub> OSi                           | Trimethyl [4-(1,1,3,3-tetramethylbutyl)<br>phenoxy] silane | 0.68                    |
| 32.512                  | C <sub>22</sub> H <sub>46</sub>                               | 6,6-diethylhooctadecane                                    | 0.99                    |
| 32.637                  | C <sub>30</sub> H <sub>50</sub>                               | Squaleme                                                   | 1.86                    |
| 33.387                  | C <sub>6</sub> H <sub>18</sub> O <sub>3</sub> Si <sub>3</sub> | Hexamethyl-cyclotrisiloxane                                | 1.55                    |

Table S2. Peak areas of evolved compounds at 820 °C in SMR process by GC/MS.

| Retention time<br>(min) | Molecular<br>formula                                            | Compounds                                          | Relative<br>content (%) |
|-------------------------|-----------------------------------------------------------------|----------------------------------------------------|-------------------------|
| 3.054                   | C <sub>5</sub> H <sub>8</sub> O <sub>2</sub>                    | Methyl methacrylate                                | 3.75                    |
| 3.650                   | C <sub>21</sub> H <sub>15</sub> O <sub>9</sub> NF <sub>12</sub> | Tetrakis                                           | 0.90                    |
| 3.825                   | C <sub>7</sub> H <sub>8</sub>                                   | Toluene                                            | 10.63                   |
| 4.635                   | C <sub>6</sub> H <sub>18</sub> O <sub>3</sub> Si <sub>3</sub>   | Hexamethyl-cyclotrisiloxane                        | 2.37                    |
| 5.115                   | C <sub>8</sub> H <sub>16</sub> O <sub>2</sub>                   | CIS-1,2-cyclohexanedimethanol                      | 1.19                    |
| 5.585                   | C <sub>8</sub> H <sub>10</sub>                                  | Ethylbenzene                                       | 1.10                    |
| 5.766                   | C <sub>8</sub> H <sub>10</sub>                                  | P-xylene                                           | 3.19                    |
| 6.226                   | C <sub>15</sub> H <sub>14</sub> O <sub>2</sub>                  | Benzoic acid                                       | 4.44                    |
| 6.986                   | C <sub>8</sub> H <sub>14</sub> ONF <sub>3</sub>                 | 1-(3,3,3-trifluoro-2-hydroxypropyl)<br>piperrazine | 1.30                    |
| 8.437                   | C <sub>9</sub> H <sub>10</sub>                                  | 2-propenyl-benzene                                 | 1.24                    |
| 9.187                   | C <sub>10</sub> H <sub>16</sub>                                 | D-limonene                                         | 3.09                    |
| 9.482                   | C <sub>9</sub> H <sub>8</sub>                                   | 3-methylphenylacetylene                            | 1.72                    |
| 12.313                  | C <sub>10</sub> H <sub>8</sub>                                  | Naphthalene                                        | 4.59                    |
| 13.049                  | C <sub>8</sub> H <sub>10</sub> O <sub>2</sub>                   | 1,2-benzenedimethanol                              | 0.94                    |
| 14.329                  | C <sub>11</sub> H <sub>10</sub>                                 | 2-methyl-naphthalene                               | 1.28                    |
| 14.539                  | C <sub>9</sub> H <sub>10</sub> O <sub>2</sub>                   | 2-methoxy-4-vinylphenol                            | 1.47                    |
| 14.604                  | C <sub>11</sub> H <sub>10</sub>                                 | 1-methyl-naphthalene                               | 1.81                    |
| 17.445                  | C <sub>6</sub> H <sub>10</sub> O <sub>5</sub>                   | 1,6-anhydro-beta-D-glucopyranose                   | 2.10                    |
| 17.560                  | C <sub>6</sub> H <sub>12</sub> O <sub>6</sub>                   | D-allose                                           | 1.28                    |
| 26.939                  | C <sub>18</sub> H <sub>18</sub>                                 | Methyl-1-isopropyl-7-phenanthrene                  | 0.97                    |
